# Supplementary material
Source: PubMed Central journal article supplement (PMC3147305)

Supporting information:

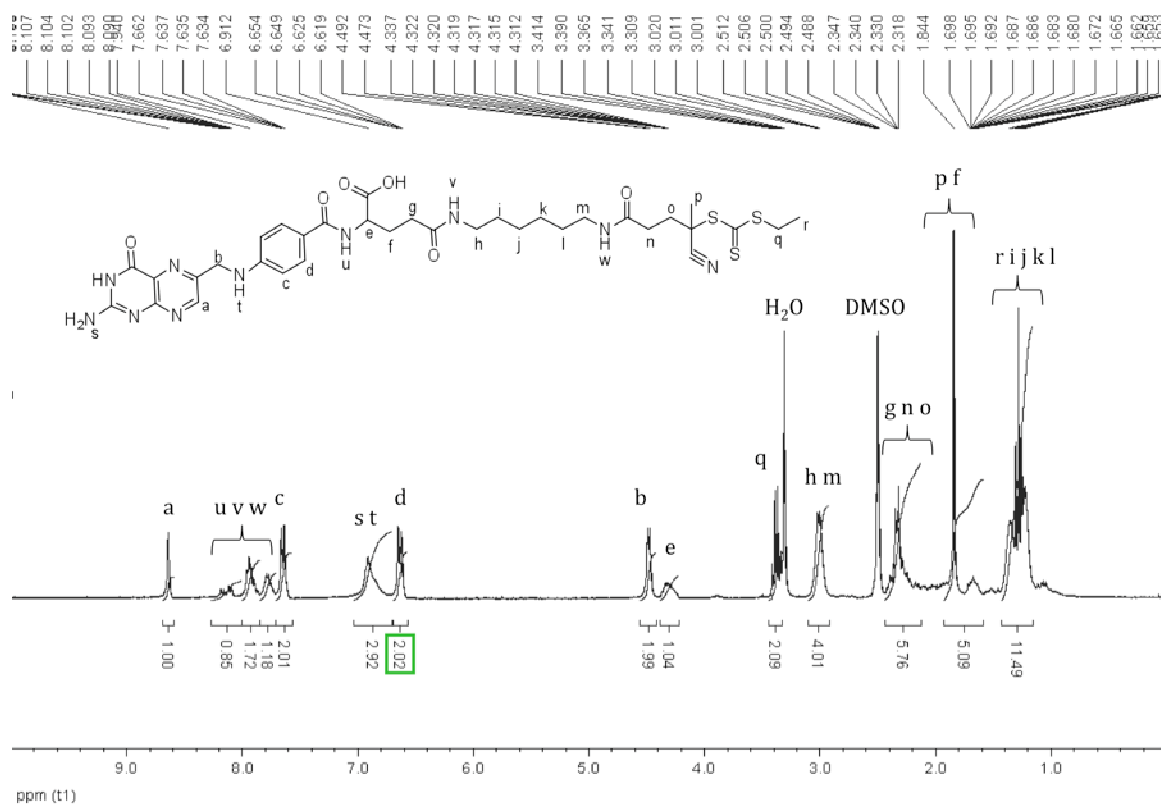

Figure S1. <sup>1</sup>H-NMR spectra of the folate-functionalized CTA.

Supplement: NIHMS302899-supplement-1_si_001.pdf [file NIHMS302899-supplement-1_si_001.pdf]
